# Supplementary material for: Presence, Location and Conservation of Putative G-Quadruplex Forming Sequences in Arboviruses Infecting Humans
Source: MDPI journal article supplement (doi:10.3390/ijms24119523), 2023-05-30
Supplement: s1 [file s1]

## Supplementary material

Original Research Article

### Presence, location and conservation of putative G-quadruplex forming sequences in arboviruses infecting humans

**Table S1. Arboviruses PQSs frequency on positive and negative RNA strands.** The table reports the analysed viruses in alphabetical order. Columns indicate the virus name (Virus), the viral genomic structure (Genome/Segments) with the name of each segment in case of segmented genomes (Segments), the total number of PQSs predicted in viral genomes (PQSs in viral genomes), the number of PQSs on the positive or negative RNA strand and relative percentages (PQSs on positive/negative strand and % PQSs on positive/negative strand, respectively). Colors corresponds to dsRNA (grey), negative strand RNA (ssRNA-, yellow), positive strand RNA (ssRNA+, blue). In segmented RNA viruses, the viral segments (S, M and L) are ordered by length.

| Virus                     | Genome/Segments   | PQSs in viral genomes | PQSs on positive strand | % PQSs on positive strand | PQSs on negative strand | % PQSs on negative strand |
|---------------------------|-------------------|-----------------------|-------------------------|---------------------------|-------------------------|---------------------------|
| Australian bat lyssavirus | Single linear RNA | 45                    | 23                      | 51.11                     | 22                      | 48.89                     |
| Banna virus               | Segment 1         | 2                     | 1                       | 50                        | 1                       | 50                        |
|                           | Segment 2         | 4                     | 2                       | 50                        | 2                       | 50                        |
|                           | Segment 3         | 6                     | 6                       | 100                       | 0                       | 0                         |
|                           | Segment 4         | 1                     | 1                       | 100                       | 0                       | 0                         |
|                           | Segment 5         | 2                     | 1                       | 50                        | 1                       | 50                        |
|                           | Segment 6         | 3                     | 3                       | 100                       | 0                       | 0                         |
|                           | Segment 7         | 2                     | 1                       | 50                        | 1                       | 50                        |
|                           | Segment 8         | 1                     | 1                       | 100                       | 0                       | 0                         |
|                           | Segment 9         | 0                     | 0                       |                           | 0                       |                           |
|                           | Segment 10        | 2                     | 1                       | 50                        | 1                       | 50                        |
|                           | Segment 11        | 3                     | 2                       | 66.67                     | 1                       | 33.33                     |
|                           | Segment 12        | 2                     | 1                       | 50                        | 1                       | 50                        |
| Barmah Forest virus       | Single linear RNA | 74                    | 26                      | 35.14                     | 48                      | 64.86                     |
| Bunyamwera virus          | Segment S         | 4                     | 2                       | 50                        | 2                       | 50                        |
|                           | Segment M         | 5                     | 3                       | 60                        | 2                       | 40                        |
|                           | Segment L         | 5                     | 4                       | 80                        | 1                       | 20                        |
| Bunyavirus La Crosse      | Segment S         | 4                     | 4                       | 100                       | 0                       | 0                         |
|                           | Segment M         | 6                     | 4                       | 66.67                     | 2                       | 33.33                     |
|                           | Segment L         | 8                     | 6                       | 75                        | 2                       | 25                        |
| Bunyavirus snowshoe hare  | Segment S         | 3                     | 3                       | 100                       | 0                       | 0                         |
|                           | Segment M         | 9                     | 7                       | 77.78                     | 2                       | 22.22                     |
|                           | Segment L         | 5                     | 5                       | 100                       | 0                       | 0                         |
| Chandipura virus          | Single linear RNA | 46                    | 27                      | 58.70                     | 19                      | 41.30                     |

|                                       |                   |     |     |       |    |       |
|---------------------------------------|-------------------|-----|-----|-------|----|-------|
| Chikungunya virus                     | Single linear RNA | 65  | 28  | 43.08 | 37 | 56.92 |
| Crimean-Congo hemorrhagic fever virus | Segment S         | 6   | 2   | 33.33 | 4  | 66.67 |
|                                       | Segment M         | 23  | 12  | 52.17 | 11 | 47.83 |
|                                       | Segment L         | 18  | 17  | 94.44 | 1  | 5.55  |
| Dengue virus 1                        | Single linear RNA | 61  | 43  | 70.49 | 18 | 29.51 |
| Dengue virus 2                        | Single linear RNA | 64  | 47  | 73.44 | 17 | 26.56 |
| Dengue virus 3                        | Single linear RNA | 69  | 55  | 79.71 | 14 | 20.29 |
| Dengue virus 4                        | Single linear RNA | 77  | 53  | 68.83 | 24 | 31.17 |
| Dhori virus                           | Segment 1         | 10  | 3   | 30    | 7  | 70    |
|                                       | Segment 2         | 5   | 3   | 60    | 2  | 40    |
|                                       | Segment 3         | 7   | 3   | 42.86 | 4  | 57.14 |
|                                       | Segment 4         | 11  | 8   | 72.73 | 3  | 27.27 |
|                                       | Segment 5         | 4   | 3   | 75    | 1  | 25    |
|                                       | Segment 6         | 5   | 3   | 60    | 2  | 40    |
| Dugbe virus                           | Segment S         | 5   | 5   | 100   | 0  | 0     |
|                                       | Segment M         | 12  | 9   | 75    | 3  | 25    |
|                                       | Segment L         | 18  | 17  | 94.44 | 1  | 5.56  |
| Eastern equine encephalitis virus     | Single linear RNA | 59  | 21  | 35.59 | 38 | 64.41 |
| Isfahan virus                         | Single linear RNA | 33  | 23  | 69.70 | 10 | 30.30 |
| Japanese encephalitis virus           | Single linear RNA | 101 | 71  | 70.30 | 30 | 29.70 |
| Langat virus                          | Single linear RNA | 125 | 106 | 84.80 | 19 | 15.20 |
| Louping ill virus                     | Single linear RNA | 130 | 107 | 82.31 | 23 | 17.69 |
| Mayaro virus                          | Single linear RNA | 66  | 29  | 43.94 | 37 | 56.06 |
| Murray Valley encephalitis virus      | Single linear RNA | 87  | 60  | 68.97 | 27 | 31.03 |
| O'nyong-nyong virus                   | Single linear RNA | 53  | 27  | 50.94 | 26 | 49.06 |
| Oropouche virus                       | Segment S         | 4   | 3   | 75    | 1  | 25    |
|                                       | Segment M         | 2   | 1   | 50    | 1  | 50    |
|                                       | Segment L         | 2   | 0   | 0     | 2  | 100   |
| Punta Toro phlebovirus                | Segment S         | 4   | 1   | 25    | 3  | 75    |
|                                       | Segment M         | 6   | 6   | 100   | 0  | 0     |
|                                       | Segment L         | 12  | 12  | 100   | 0  | 0     |
| Rift Valley fever virus               | Segment S         | 8   | 2   | 25    | 6  | 75    |
|                                       |                   | 16  | 13  | 81.25 | 3  | 18.75 |
|                                       | Segment M         |     |     |       |    |       |
|                                       | Segment L         | 24  | 16  | 66.67 | 8  | 33.33 |

|                                                |                   |     |    |       |    |       |
|------------------------------------------------|-------------------|-----|----|-------|----|-------|
| Ross River virus                               | Single linear RNA | 76  | 40 | 52.63 | 36 | 47.37 |
| Sagiyama virus                                 | Single linear RNA | 71  | 31 | 43.66 | 40 | 56.34 |
| Sandfly fever Sicilian virus                   | Segment S         | 7   | 7  | 100   | 0  | 0     |
|                                                | Segment M         | 17  | 14 | 82.35 | 3  | 17.65 |
|                                                | Segment L         | 23  | 18 | 78.26 | 5  | 21.74 |
| Sandfly fever Toscana virus                    | Segment S         | 7   | 2  | 28.57 | 5  | 71.43 |
|                                                | Segment M         | 17  | 10 | 58.82 | 7  | 41.18 |
|                                                | Segment L         | 21  | 17 | 80.95 | 4  | 19.05 |
| Semliki Forest virus                           | Single linear RNA | 95  | 51 | 53.68 | 44 | 46.32 |
| Sindbis virus                                  | Single linear RNA | 68  | 21 | 30.88 | 47 | 69.12 |
| St. Louis encephalitis virus                   | Single linear RNA | 85  | 66 | 77.65 | 19 | 22.35 |
| Tick-borne encephalitis virus                  | Single linear RNA | 120 | 95 | 79.17 | 25 | 20.83 |
| Tick-borne powassan virus                      | Single linear RNA | 123 | 98 | 79.67 | 25 | 20.33 |
| Usutu virus                                    | Single linear RNA | 92  | 62 | 67.39 | 30 | 32.61 |
| Uukuniemi virus                                | Segment S         | 8   | 5  | 62.50 | 3  | 37.5  |
|                                                | Segment M         | 16  | 11 | 68.75 | 5  | 31.25 |
|                                                | Segment L         | 30  | 17 | 56.67 | 13 | 43.33 |
| Venezuelan equine encephalitis virus           | Single linear RNA | 63  | 28 | 44.44 | 35 | 55.56 |
| Vesicular stomatitis virus strain Indiana      | Single linear RNA | 34  | 18 | 52.94 | 16 | 47.06 |
| Vesicular stomatitis virus non-Indiana strains | Single linear RNA | 29  | 23 | 79.31 | 6  | 20.69 |
| West Nile virus                                | Single linear RNA | 88  | 70 | 79.55 | 18 | 20.45 |
| Western equine encephalitis virus              | Single linear RNA | 55  | 25 | 45.45 | 30 | 54.54 |
| Yellow fever virus                             | Single linear RNA | 94  | 73 | 77.66 | 21 | 22.34 |
| Zika virus                                     | Single linear RNA | 101 | 79 | 78,22 | 22 | 21,78 |

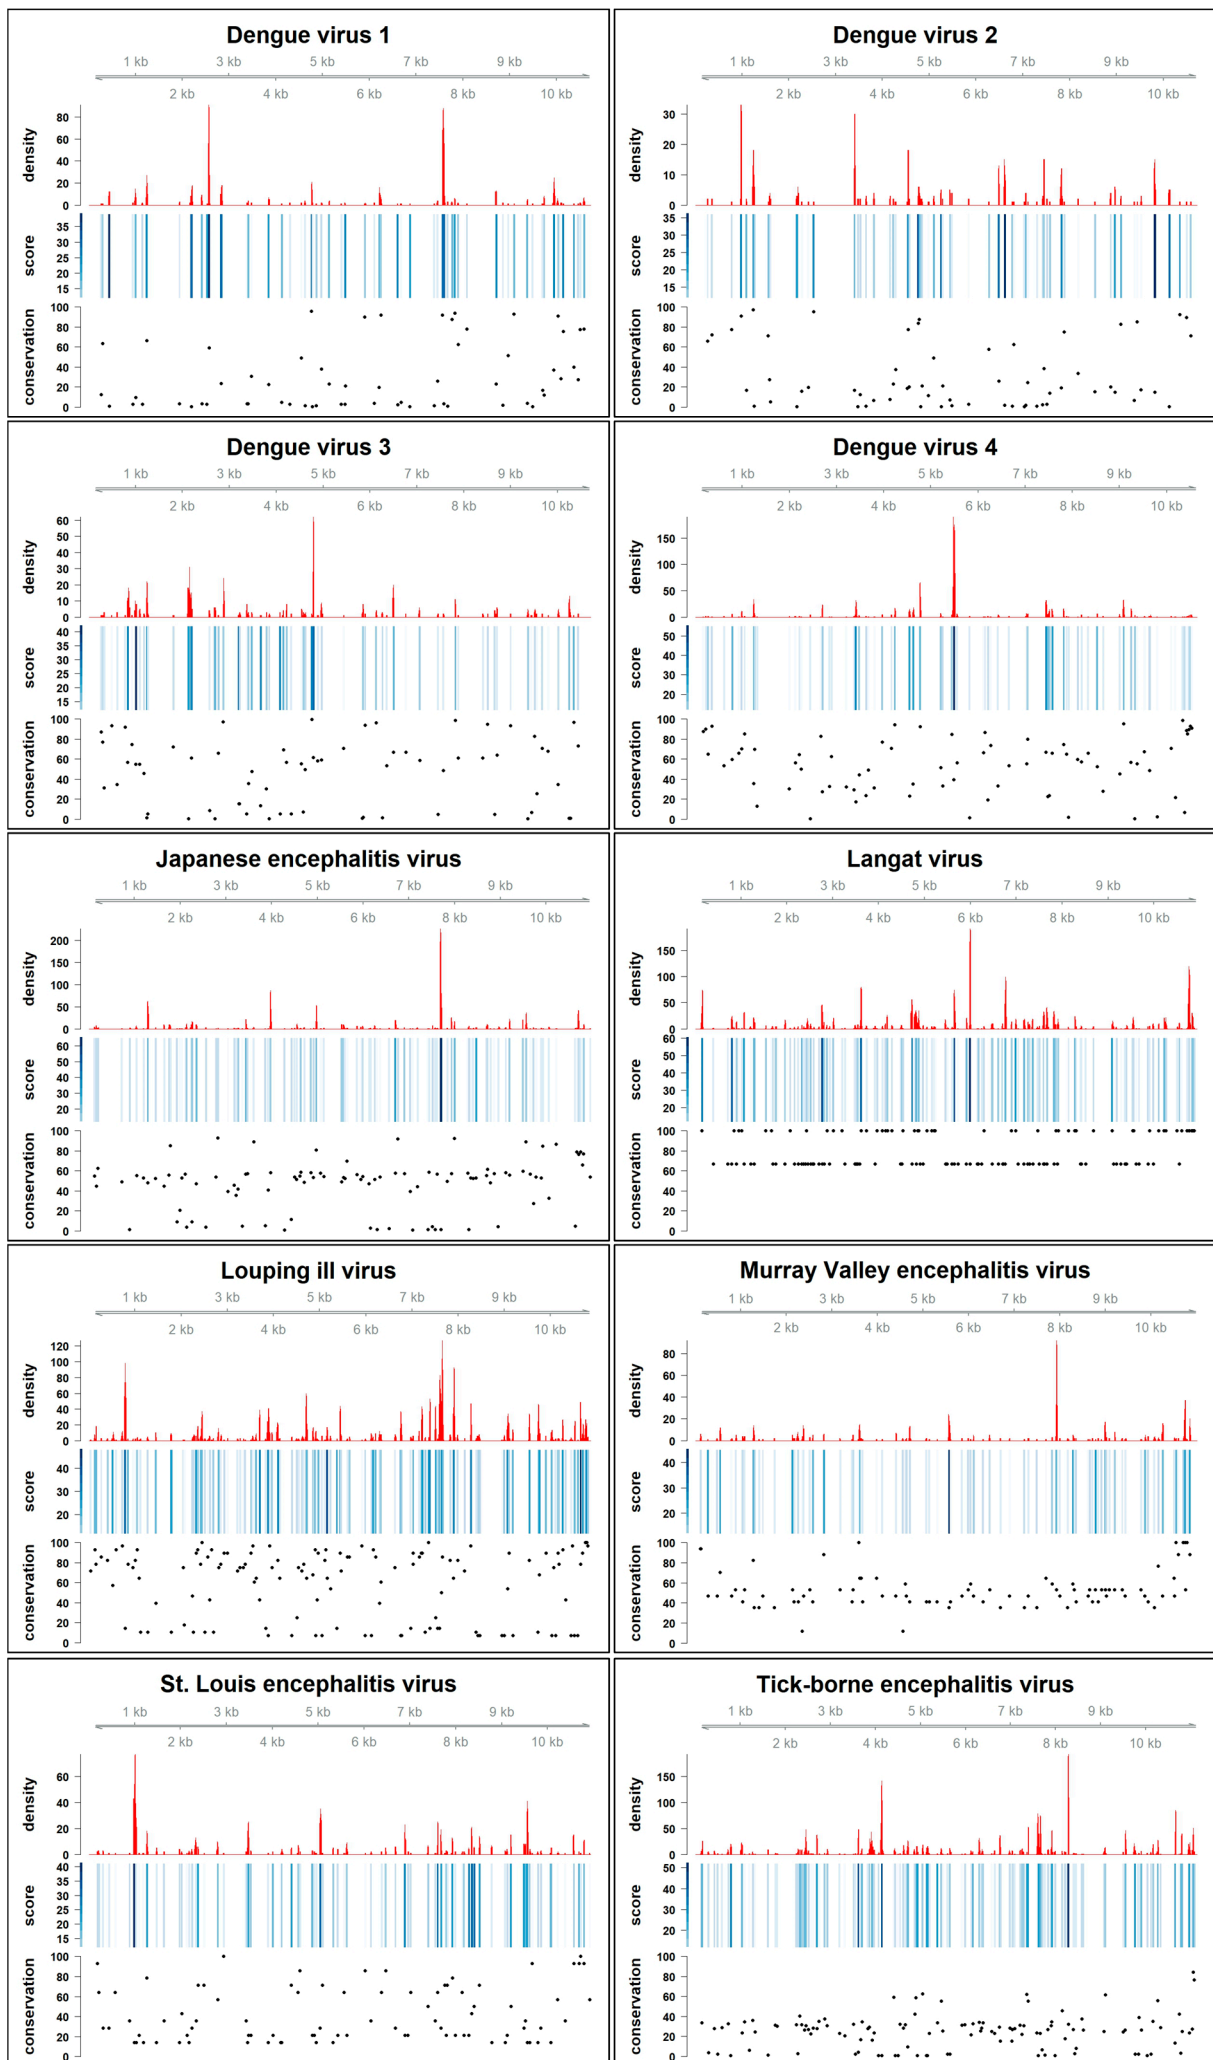

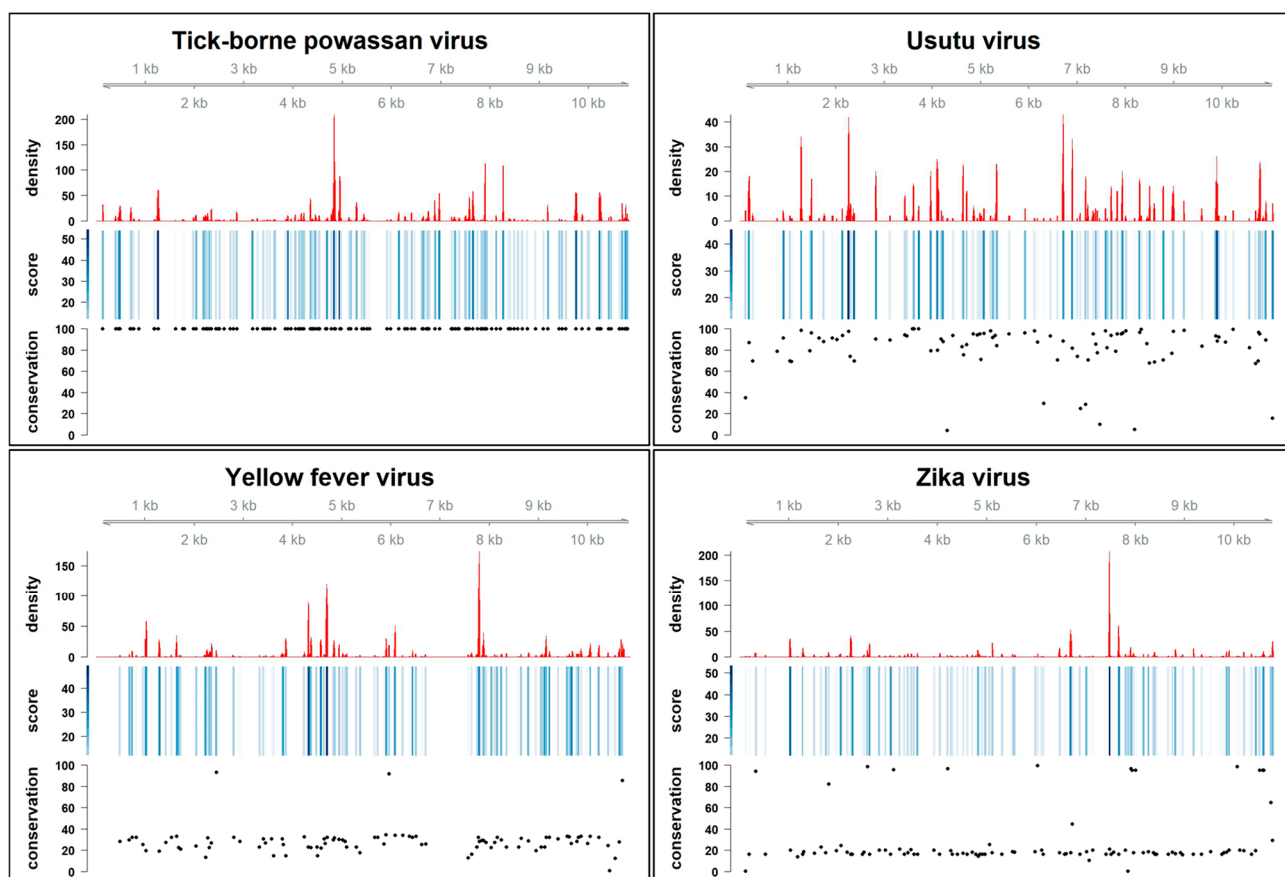

**Figure S1. Presence, density, score and conservation of PQSs in positive-strand ssRNA genome viruses (Flaviviruses)**

Plots representing the PQS density (red bars), the score (blue bars) and the conservation percentage (black dots) of each predicted PQS. The viral genome length is reported above the density plot.

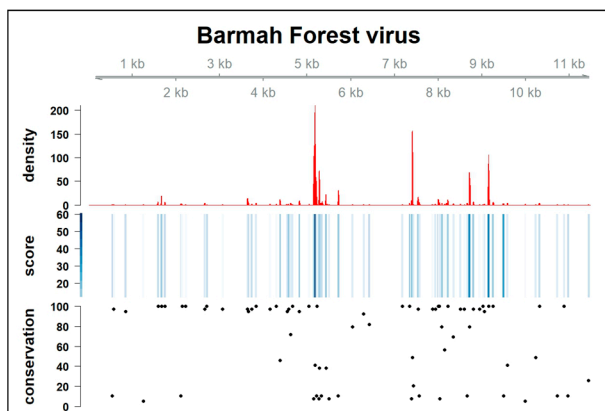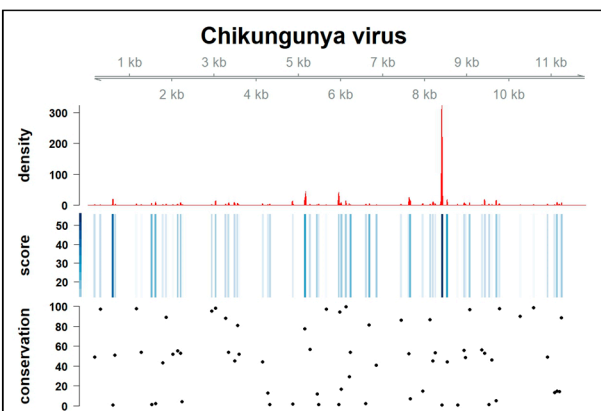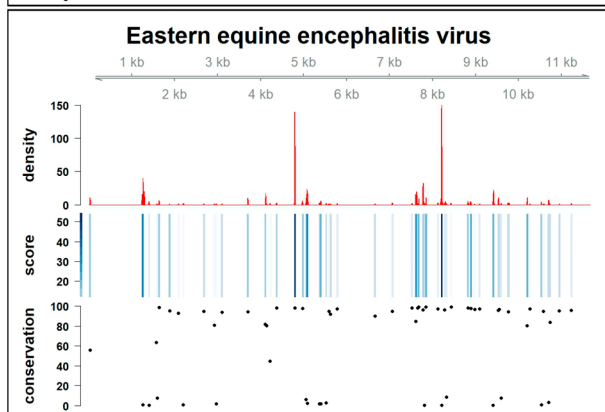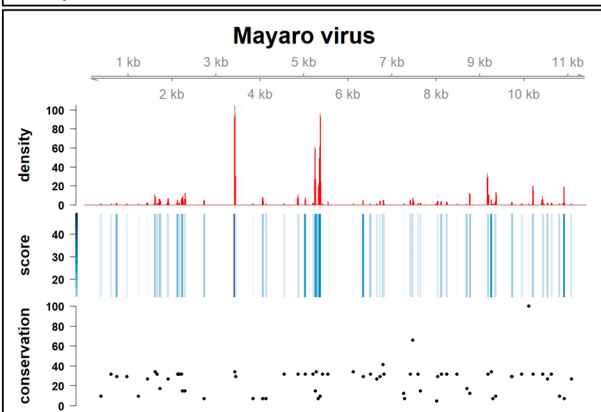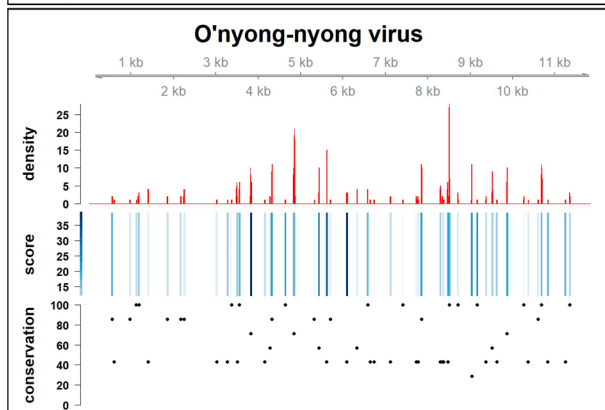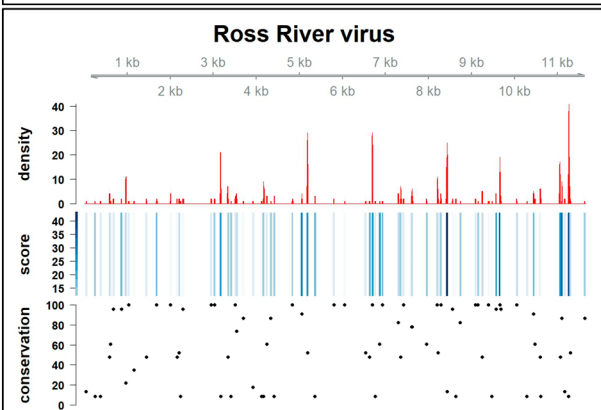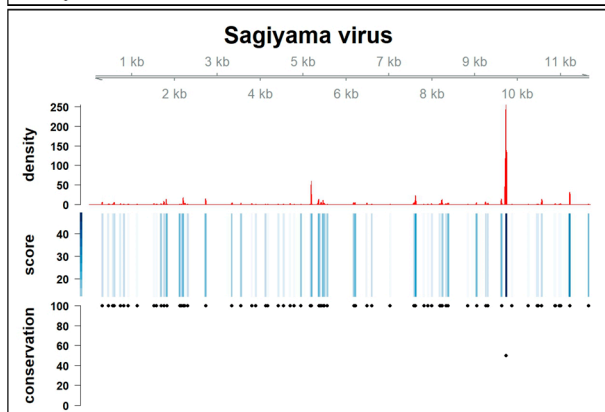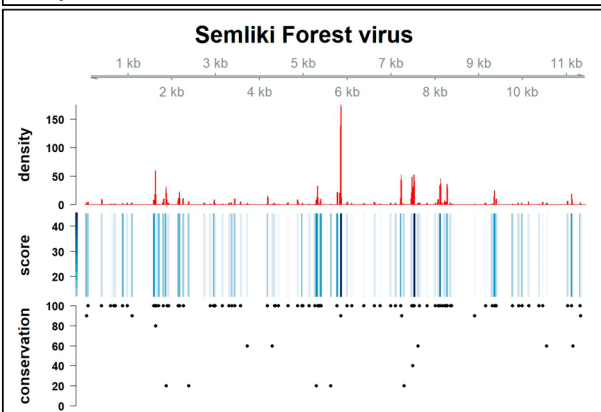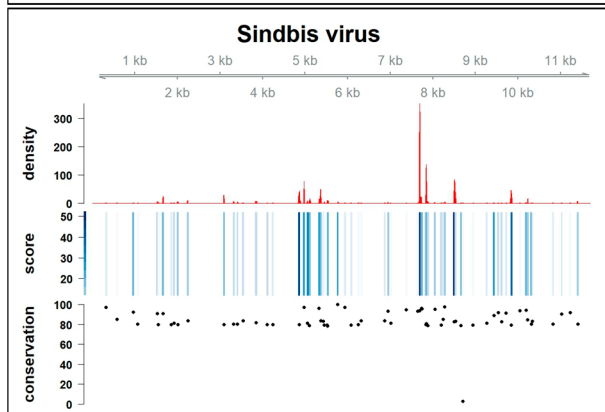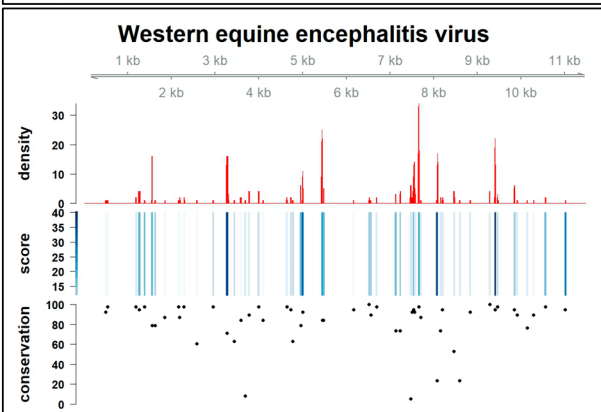

**Figure S2. Presence, density, score and conservation of PQSs in positive-strand ssRNA genome viruses (Alphaviruses)**

Plots representing the PQS density (red bars), the score (blue bars) and the conservation percentage (black dots) of each predicted PQS. The viral genome length is reported above the density plot.

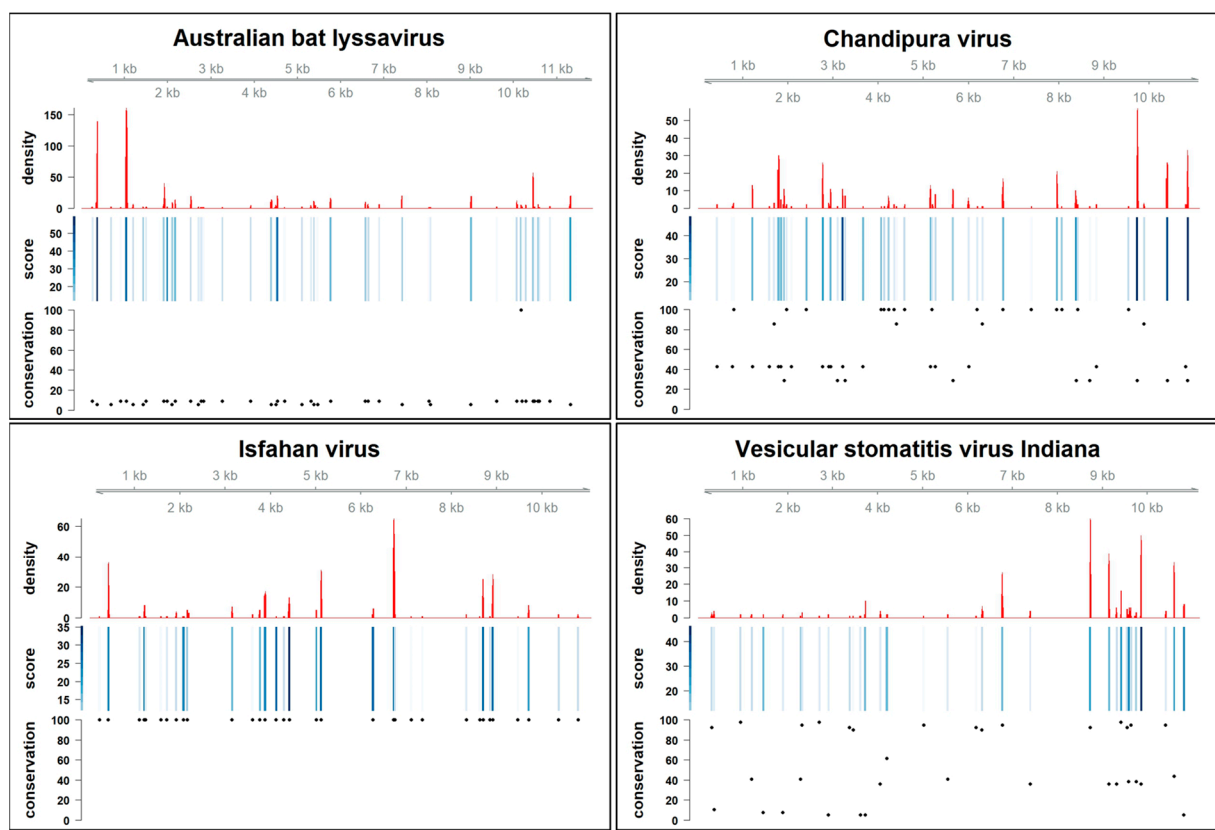

**Figure S3. Presence, density, score and conservation of PQSs in negative-strand linear ssRNA genome viruses**

Plots representing the PQS density (red bars), the score (blue bars) and the conservation percentage (black dots) of each predicted PQS. The viral genome length is reported above the density plot.



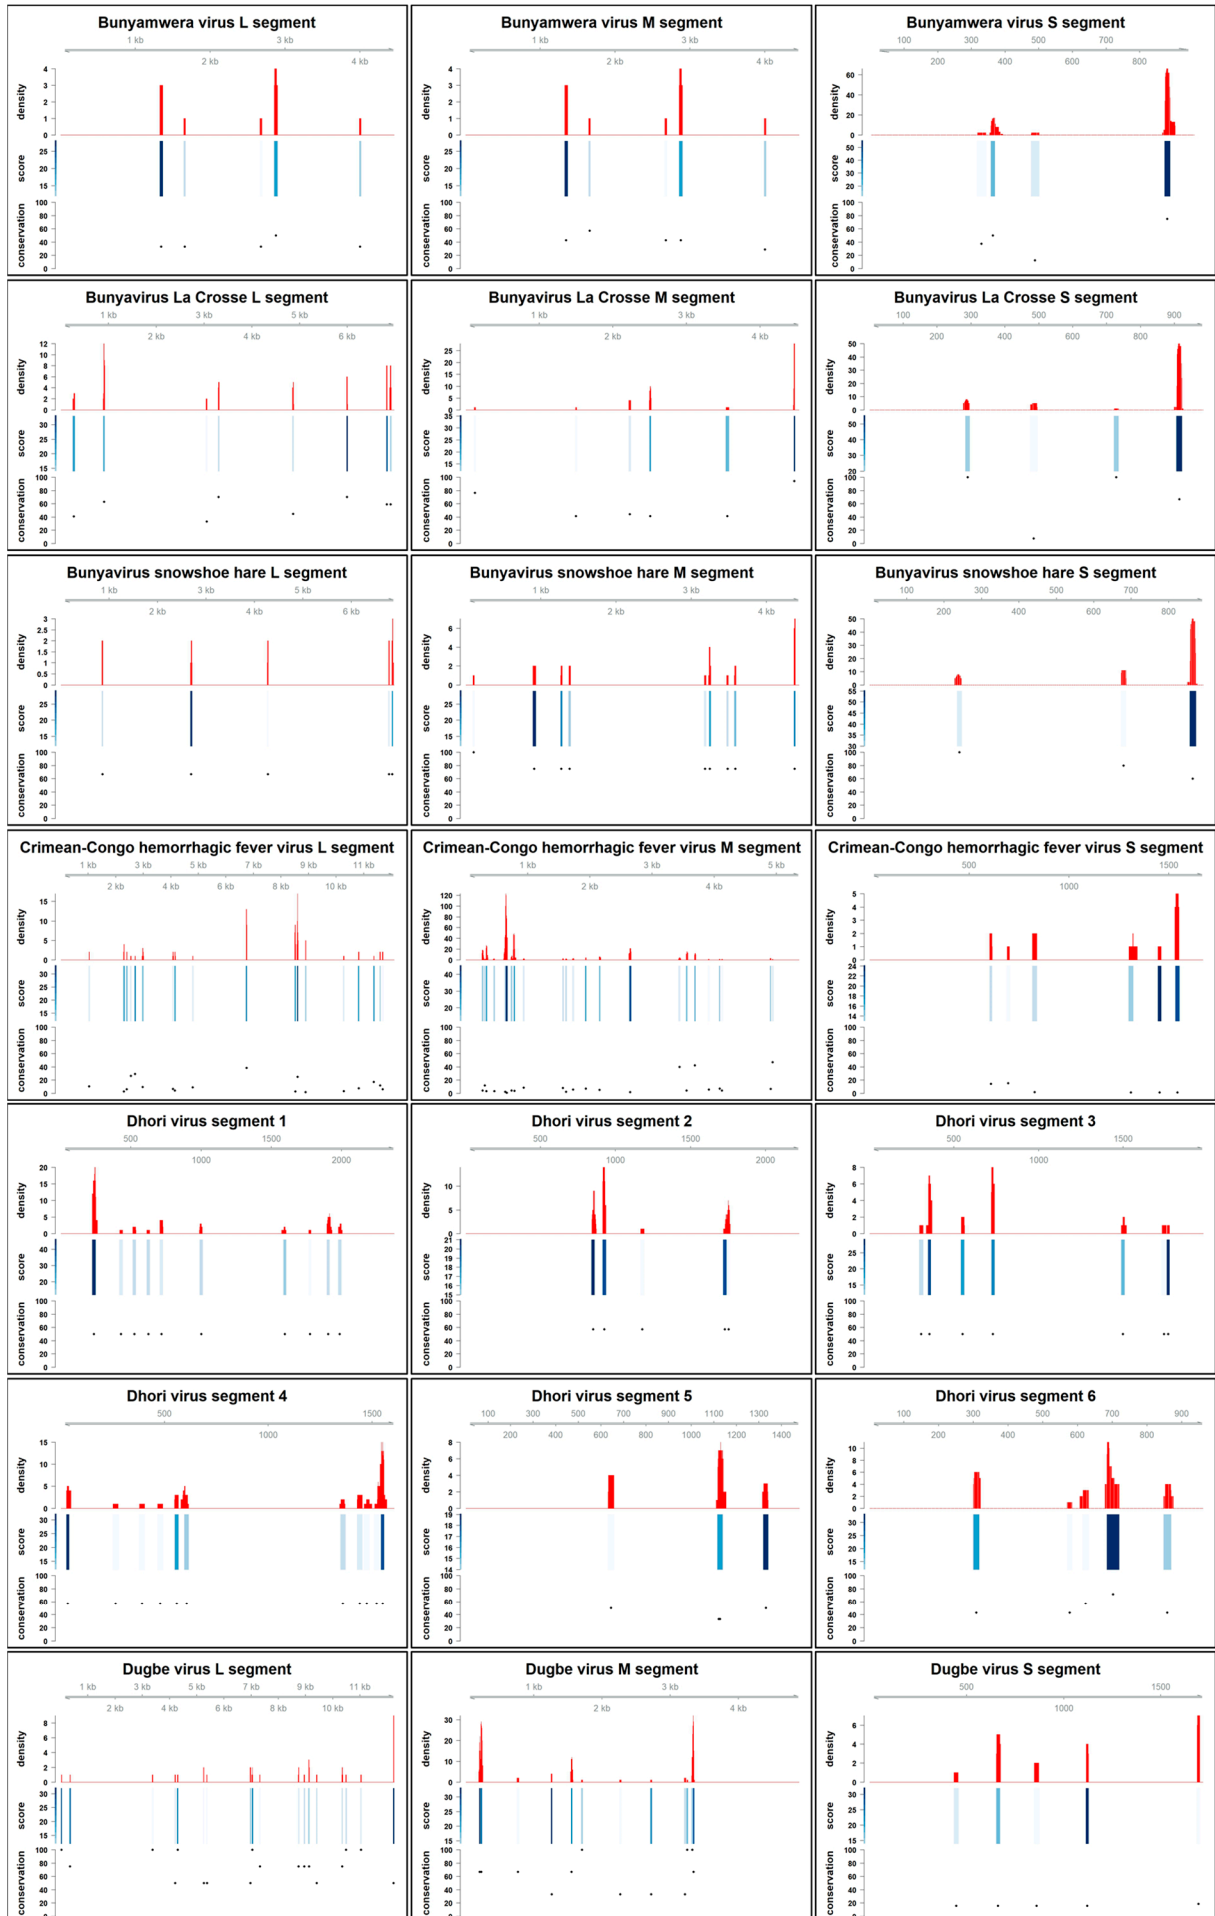

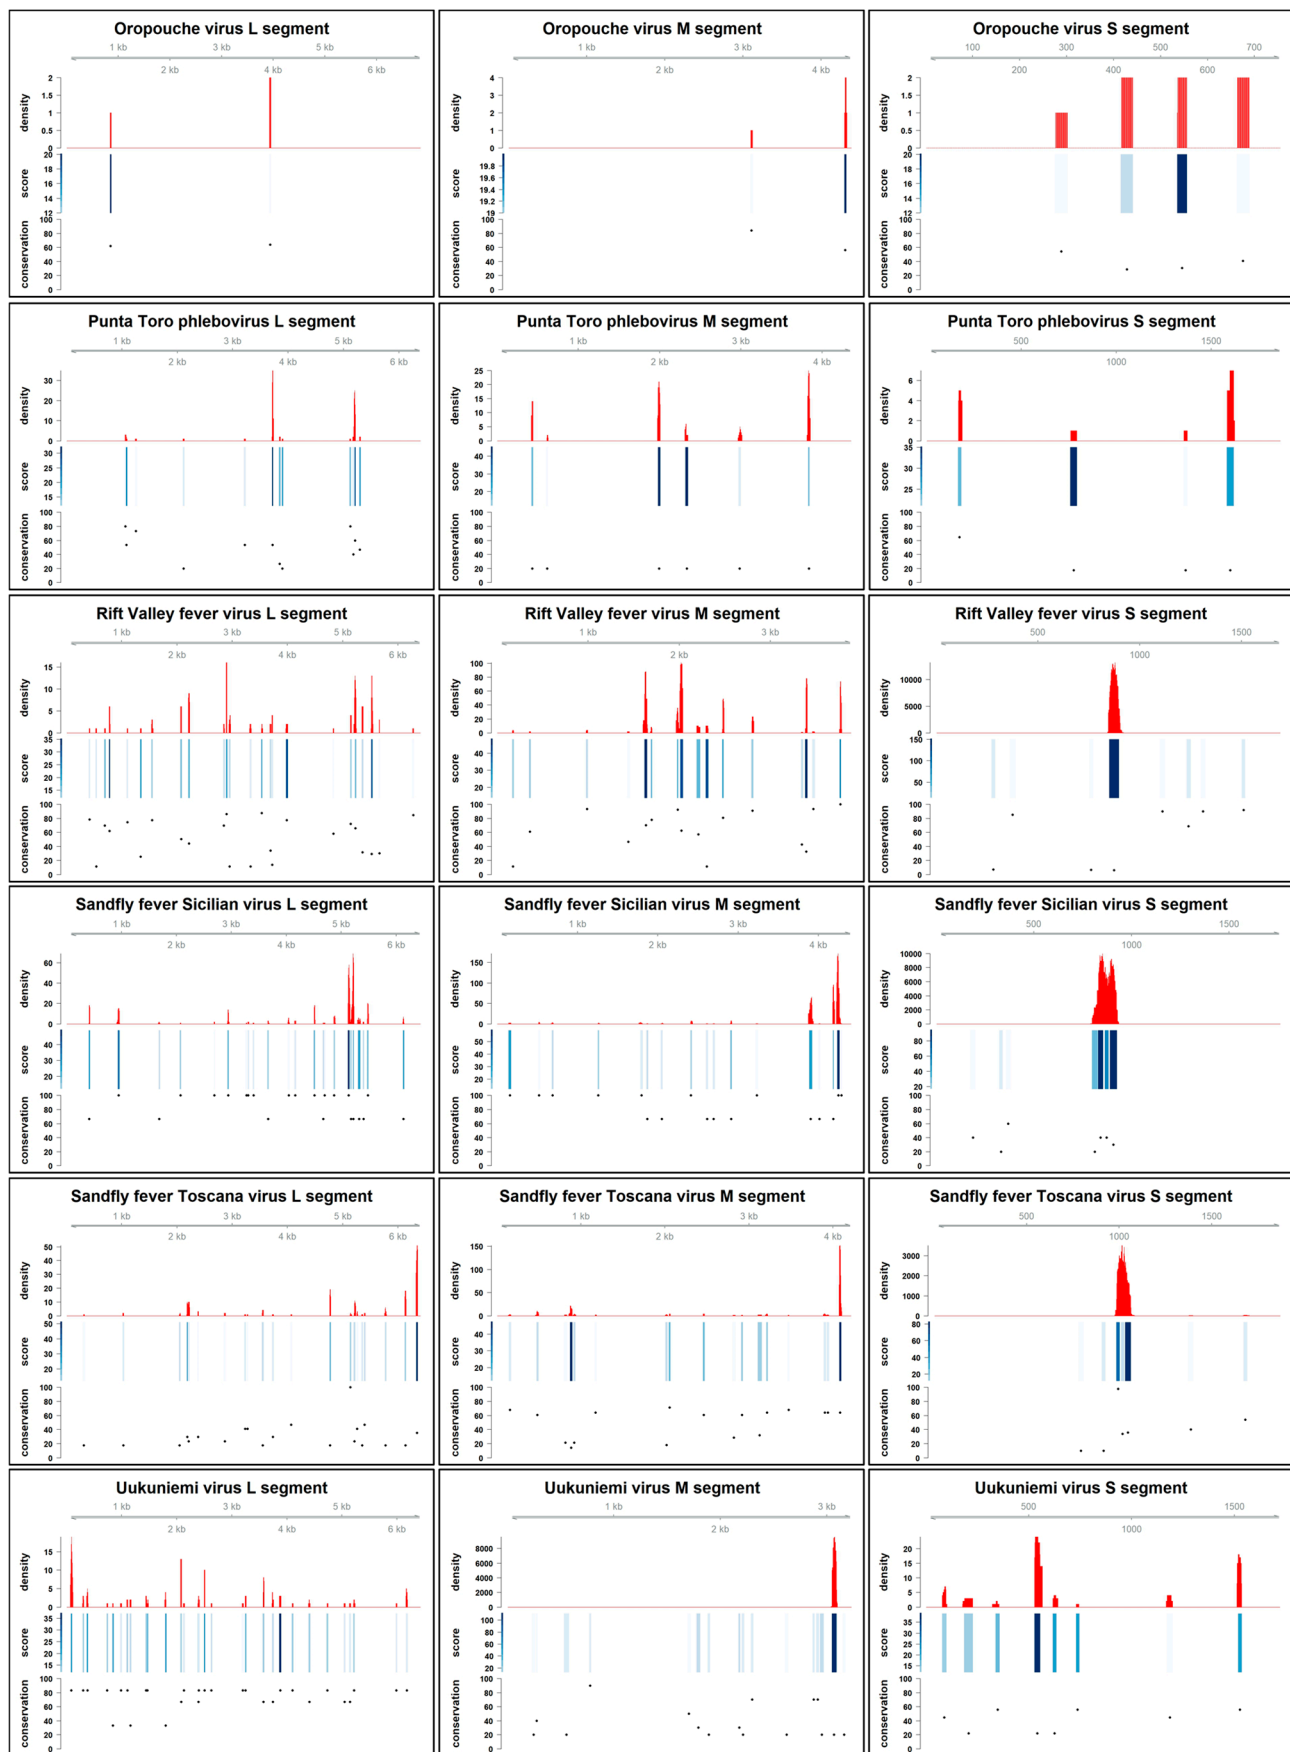

**Figure S4. Presence, density, score and conservation of PQSs in negative-strand segmented ssRNA genome viruses**

Plots representing the PQS density (red bars), the score (blue bars) and the conservation percentage (black dots) of each predicted PQS. The viral genome length is reported above the density plot. The viral segments are in alphabetical orders. In panels with long virus names, the word segment has been abbreviated to “seg”.

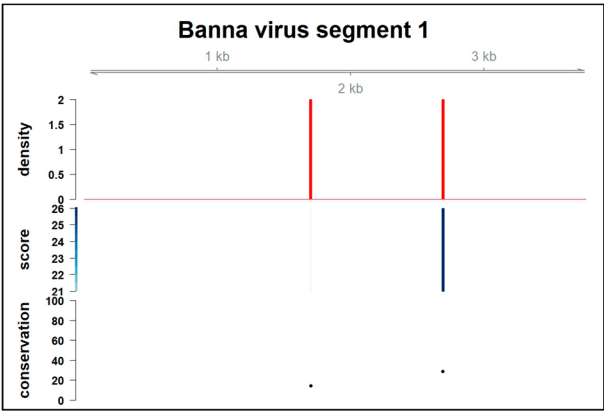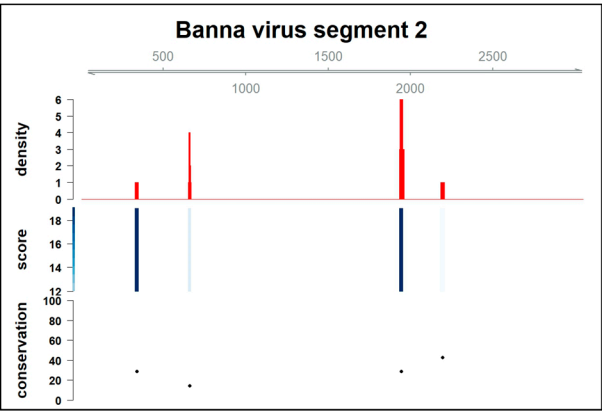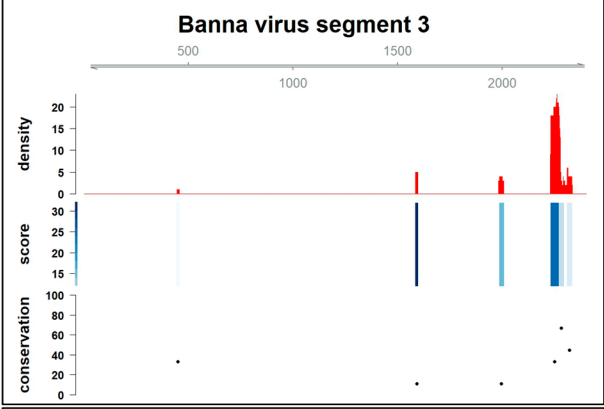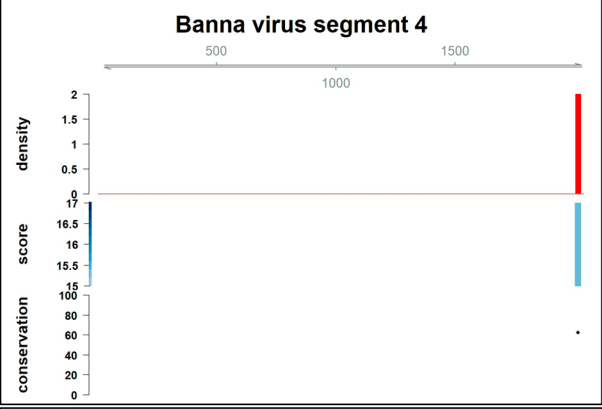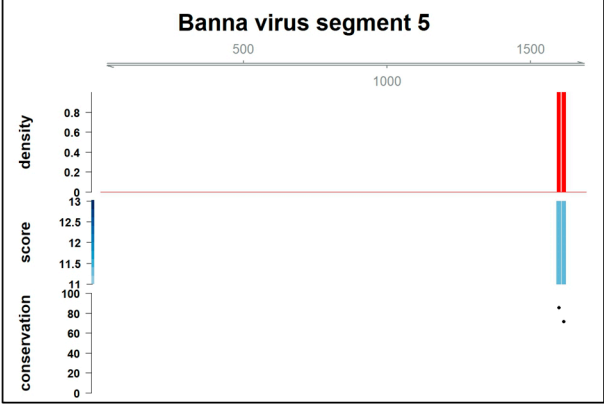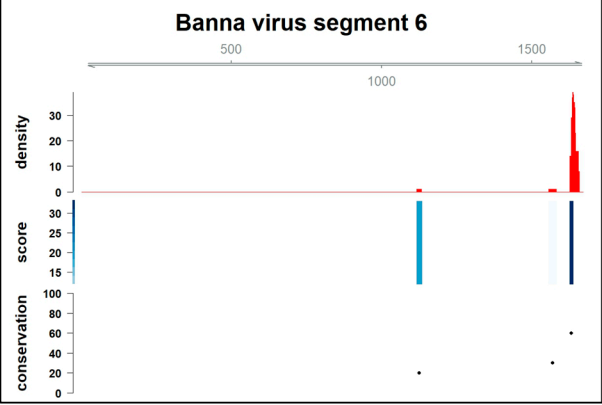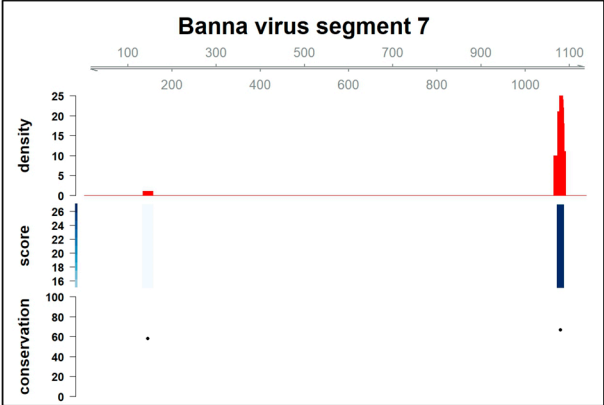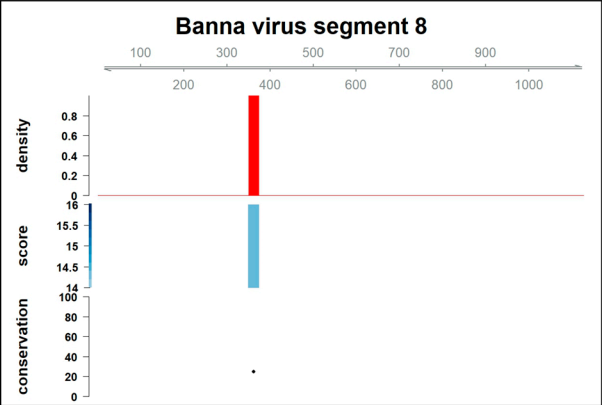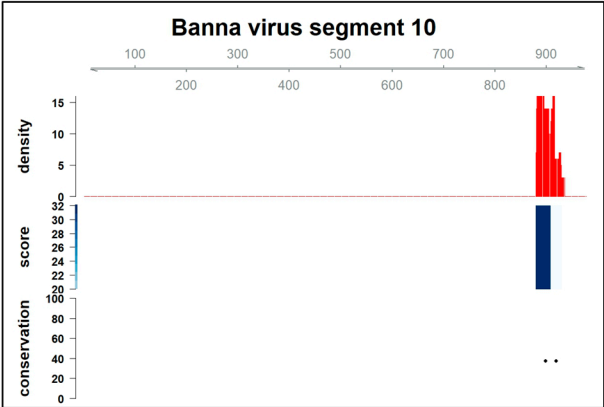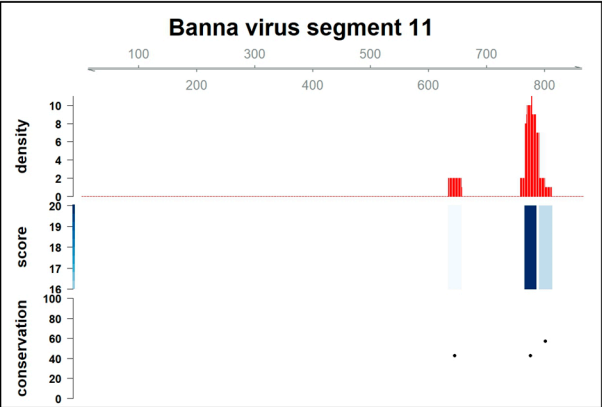

### Figure S5. Presence, density, score and conservation of PQSs in dsRNA genome viruses

Plots representing the PQS density (red bars), the score (blue bars) and the conservation percentage (black dots) of each predicted PQS. The viral genome length is reported above the density plot. Segment 9 contains no PQS and it is not represented.

## Positive polarity ssRNA Flaviviruses

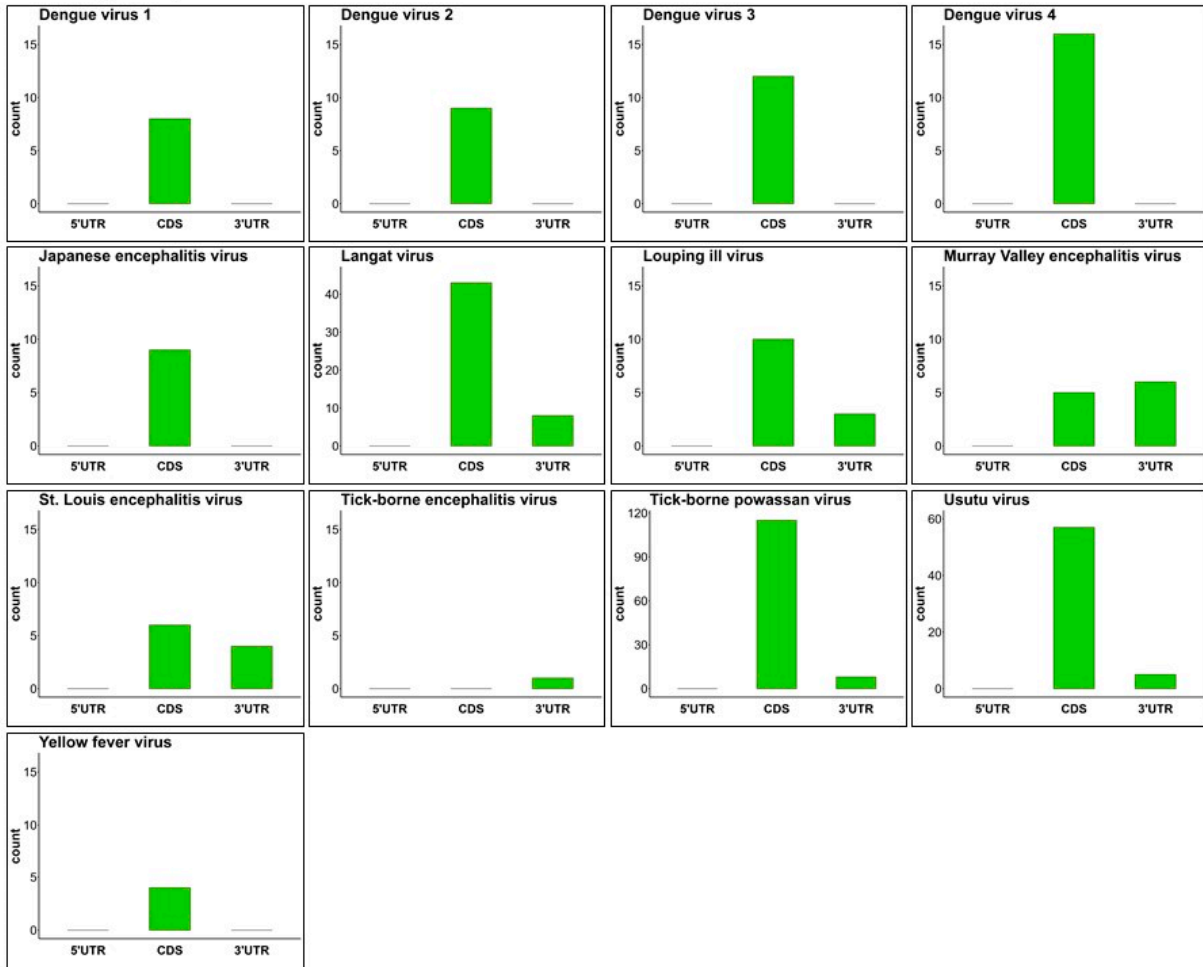

## Positive polarity ssRNA Alphaviruses

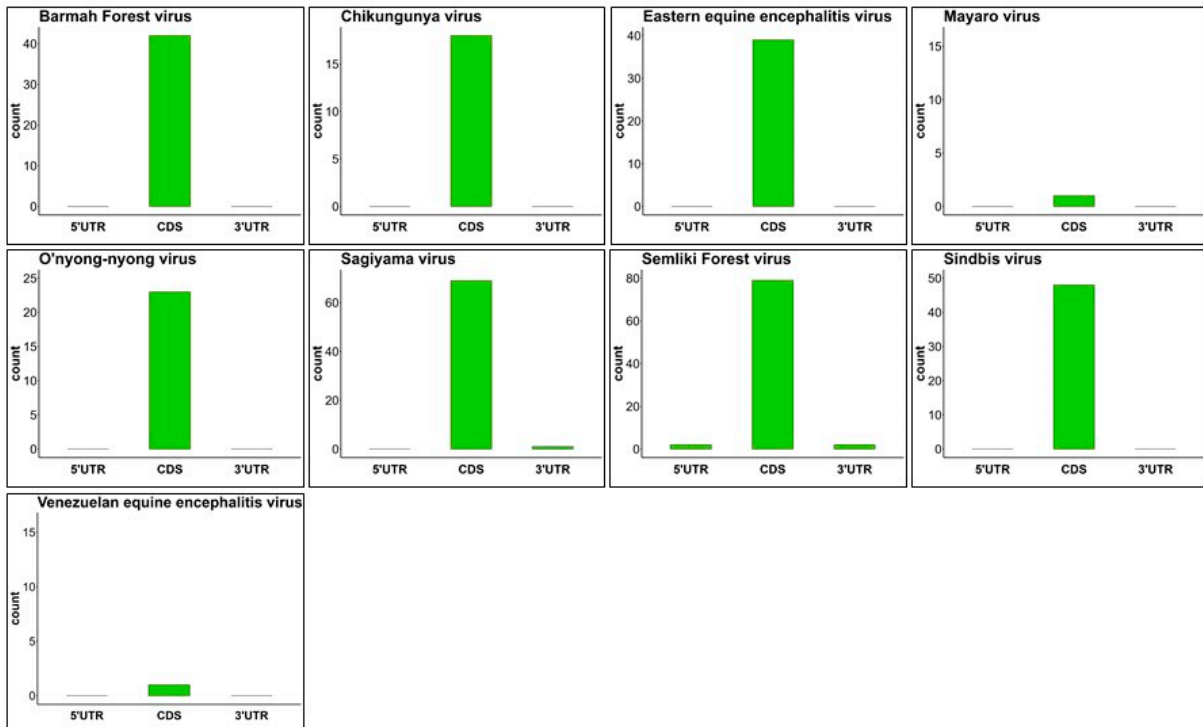

## Segmented negative polarity ssRNA viruses

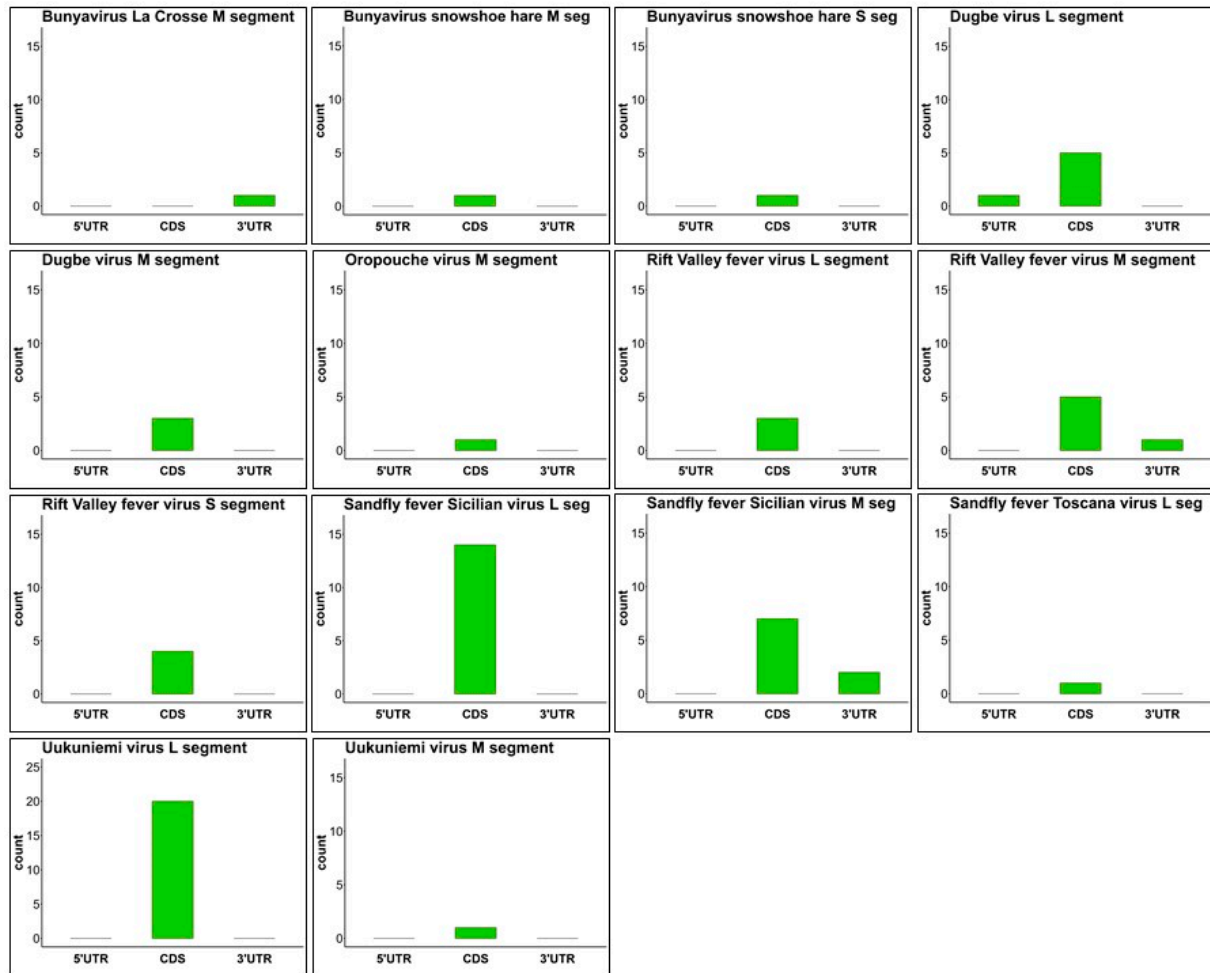

## Single linear negative polarity ssRNA

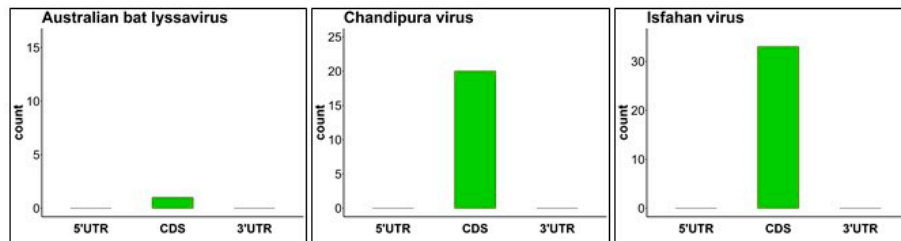

**Figure S6. Conserved PQSs genomic localization in arboviruses**

Plots reporting the annotation of highly conserved PQSs. Each viral genome was divided into three regions: Untranslated regions (5' and 3' UTRs) and coding sequences (CDS). PQSs were annotated on the basis of the official NCBI annotation of each viral Reference genome. In panels with long virus names, the word segment has been abbreviated to "seg".

**Additional supplementary material provided:** Zipped file containing the complete set of aligned viral genomes in FASTA format (aligned\_genomes.zip).
